# Supplementary material for: Synthesis of Sb–pyromellitic acid metal–organic framework material and its sodium storage properties
Source: Royal Society of Chemistry journal article supplement (doi:10.1039/d3ra02132g), 2023-01-01
Supplement: d3ra02132g1.pdf [file d3ra02132g1.pdf]

## Supporting Information

### **Synthesis of Sb-pyromellitic acid metal-organic framework material and its sodium storage properties**

Zhiyan He <sup>a</sup>, Wei Zhang <sup>a</sup>, Mingqi Li <sup>a, b \*</sup>

<sup>a</sup> College of Chemistry and Chemical Engineering, China West Normal University, Nanchong  
637009, China

<sup>b</sup> Chemical Synthesis and Pollution Control Key Laboratory of Sichuan Province, Nanchong  
637009, China

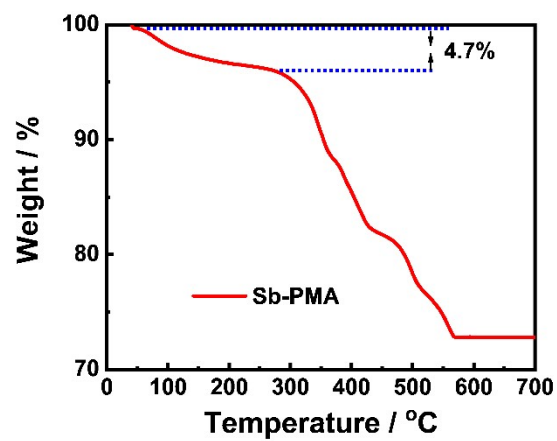

Fig. S1. TG curve of Sb-PMA

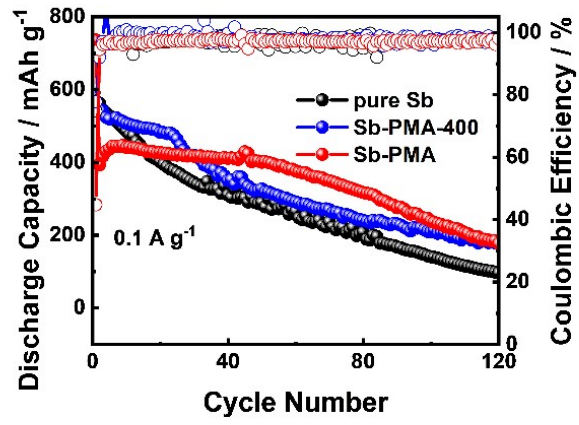

Fig. S2. Cycling performance of Sb-PMA-400 and pure Sb at 0.1 A g<sup>-1</sup>.

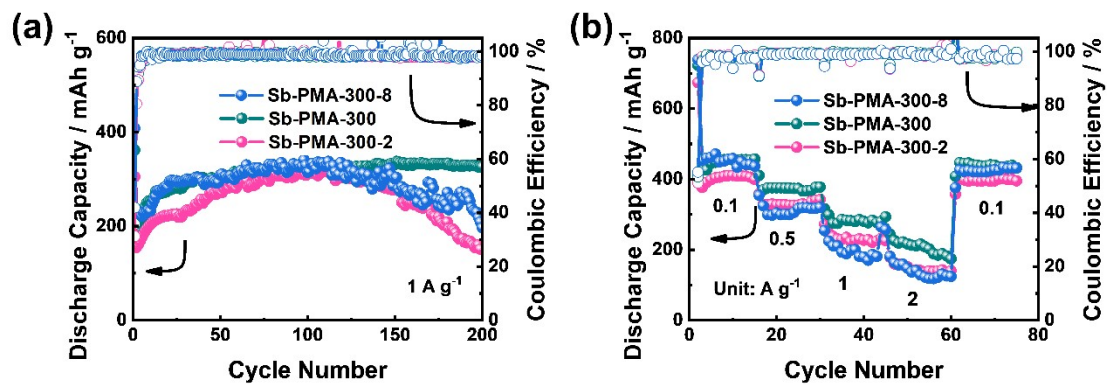

Fig. S3. (a) Cycling performance at a current density of  $0.1 \text{ A g}^{-1}$  and (b) Rate performance of Sb-PMA-300 annealed for different times.

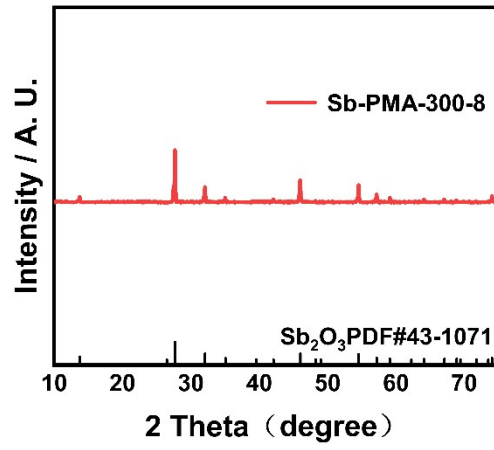

Fig. S4. XRD of Sb-PMA-300-8

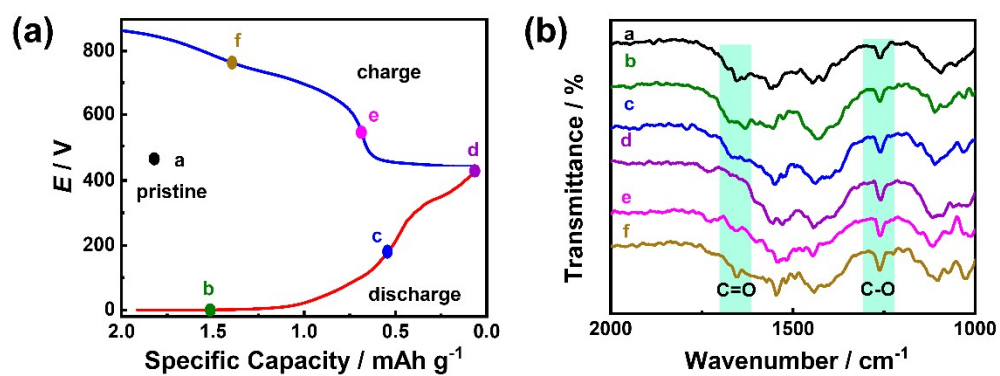

Fig. S5. (a) Discharge/charge profiles of Sb-PMA-300 at  $0.1 \text{ A g}^{-1}$  and (b) its Ex-situ FTIR spectra during cycling.

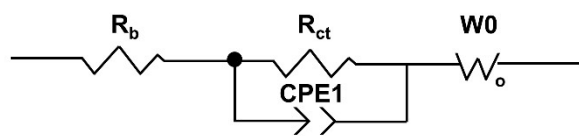

Fig. S6. EIS equivalent circuit diagrams

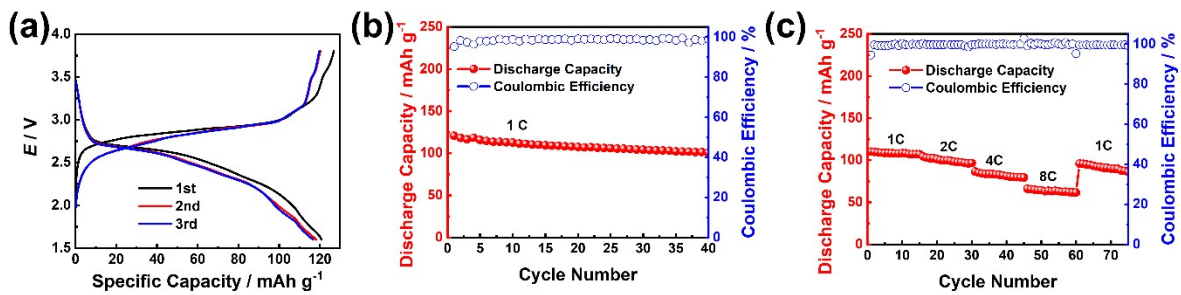

Fig. S7. (a) The charge/discharge curves, (b) cycling performance obtained at 1C (1C=0.1 A g<sup>-1</sup>) and rate capability (c) at 1C-8C of the full cell.
